# Supplementary material
Source: HighWire-hosted journal article supplement (https://jnis.bmj.com/content/neurintsurg-2021-018096)
Supplement: inline-supplementary-material-1 [file inline-supplementary-material-1.pdf]

| Term                            | Definition                                                                                                                   |
|---------------------------------|------------------------------------------------------------------------------------------------------------------------------|
| Controller-Responder            | A model of communication in robotic systems whereby the 'Responder' unit copies the input to the 'Controller' unit exactly   |
| Steerable Catheter/Sheath       | A catheter that is manipulated by a mechanism to allow controlled deflection of the distal portion of the catheter or sheath |
| Degrees of Freedom              | The number of possible independent directions of movement                                                                    |
| Tendon Drive                    | Use of straps embedded along the length of the catheter to allow deflection of catheter tip under robotic control            |
| Linear Motion                   | Advancement or retraction of catheter or guidewire                                                                           |
| Single Use Sterile Cassette     | Plastic sterile container mounted on robotic arm where driving components for the catheters and guidewires are contained     |
| Haptic Feedback                 | Tactile feedback from the controller system to the operator                                                                  |
| Caterpillar-like control system | Robotic system for controlling catheter tendons to allow tip deflection                                                      |

Supplementary Table 1: Definitions of robotic terminology for the clinician used within this review.
