# Supplementary material
Source: HighWire-hosted journal article supplement (https://jnis.bmj.com/content/neurintsurg-2021-018096)
Supplement: inline-supplementary-material-2 [file inline-supplementary-material-2.pdf]

**Supplementary Appendix S1.** PubMed, MEDLINE, EMBASE and Cochrane Register search strategies. Recommendations for a sensitive search with low precision; with subject headings with exploded terms; and with no language restrictions, were followed [1].

MEDLINE (OVID). PubMed was included.

The search strategy for Title/Abstract terms used a combination of subject headings (MeSH terms) and keywords:

Database: Ovid MEDLINE(R) ALL <1946 to April 12 2021>

Search Strategy:

- 
- 1 exp Robotics (30265)
  - 2 interventional neuroradiology (669)
  - 3 neurointervention (259)
  - 4 mechanical thrombectomy (3685)
  - 5 carotid artery stenting (2068)
  - 6 exp cerebral angiography (34008)
  - 7 2 or 3 or 4 or 5 or 6 (41032)
  - 8 1 and 7 (16)

EMBASE (OVID).

Subject headings and keywords:

Database: Embase <1974 to 2021 April 12>

Search Strategy:

- 1 exp Robotics (42604)
- 2 interventional neuroradiology (1280)

|                                             |                                               |      |
|---------------------------------------------|-----------------------------------------------|------|
| 3                                           | neurointervention (450)                       |      |
| 4                                           | exp mechanical thrombectomy (8445)            |      |
| 5                                           | exp carotid artery stent (1224)               |      |
| 6                                           | exp brain angiography (26955)                 |      |
| 7                                           | 2 or 3 or 4 or 5 or 6 (37544)                 |      |
| 8                                           | 1 and 7 (29)                                  |      |
| -----                                       |                                               |      |
| Cochrane Register.                          |                                               |      |
| Subject headings and keywords:              |                                               |      |
| Date Run: 22/02/2020 14:00                  |                                               |      |
| ID                                          | Search                                        | Hits |
| #1                                          | MeSH descriptor: [Robotics] explode all trees | 873  |
| #2                                          | neuroradiology                                | 981  |
| #3                                          | mechanical thrombectomy                       | 532  |
| #4                                          | carotid artery stent                          | 530  |
| #5                                          | cerebral angiography                          | 1184 |
| #6                                          | {OR #2-#5}                                    | 2903 |
| #7                                          | #1 AND #6                                     | 0    |
| PubMed (HDAS).                              |                                               |      |
| Subject headings and keywords:              |                                               |      |
| Database: PubMed <All performed 16/04/2021> |                                               |      |
| Search Strategy:                            |                                               |      |
| 1                                           | robot or robotic (62073)                      |      |
| 2                                           | interventional neuroradiology (5575)          |      |
| 3                                           | neurointervention (957)                       |      |
| 4                                           | mechanical thrombectomy (3675)                |      |
| 5                                           | carotid artery stenting (3068)                |      |

6 cerebral angiography (51588)

7 2 or 3 or 4 or 5 or 6 (62321)

8 1 and 7 (100)
